# Supplementary material for: Genome-Wide Association Study to Identify Bakanae Disease Resistance- Related QTLs Carrying Novel Candidate Genes in Rice (Oryza sativa L.)
Source: Research Square preprint supplement (doi:10.21203/rs.3.rs-6309254/v1), 2025-04-25
Supplement: Supplementary file 1 [file f31dea1f95b546c8b3c32a20.docx]

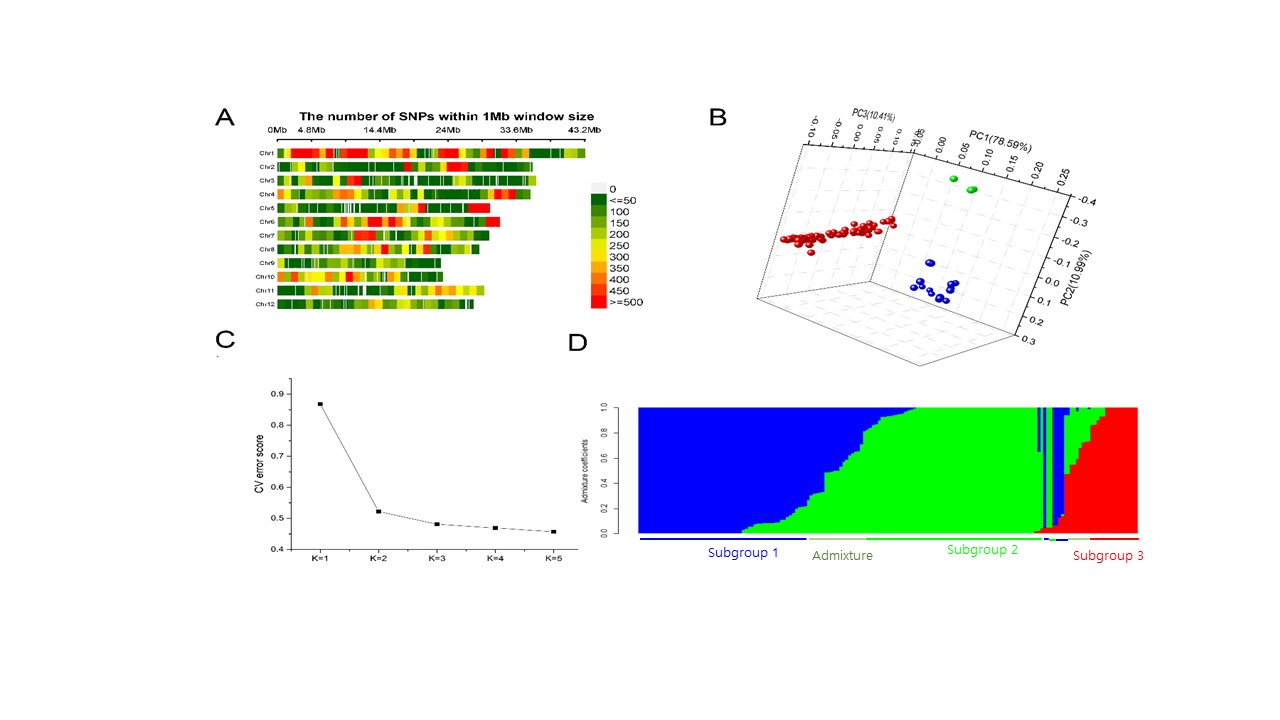


Fig S1. Population structure of 169 landraces. (A) Chromosome distribution of mapped SNPs across the whole genome of rice; (B) PCA of 169 rice varieties; (C) cross-validation (CV) error of diverse groups (K); (D) subgroups (K=3) inferred via structural software.


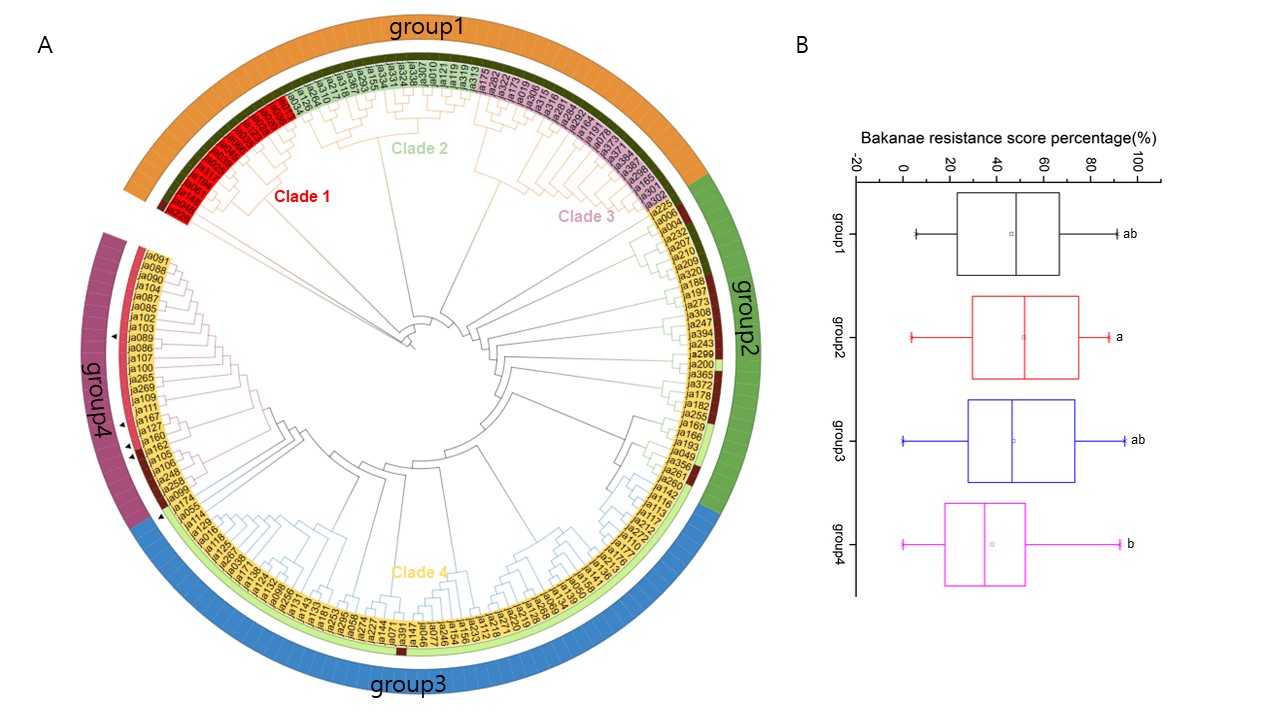


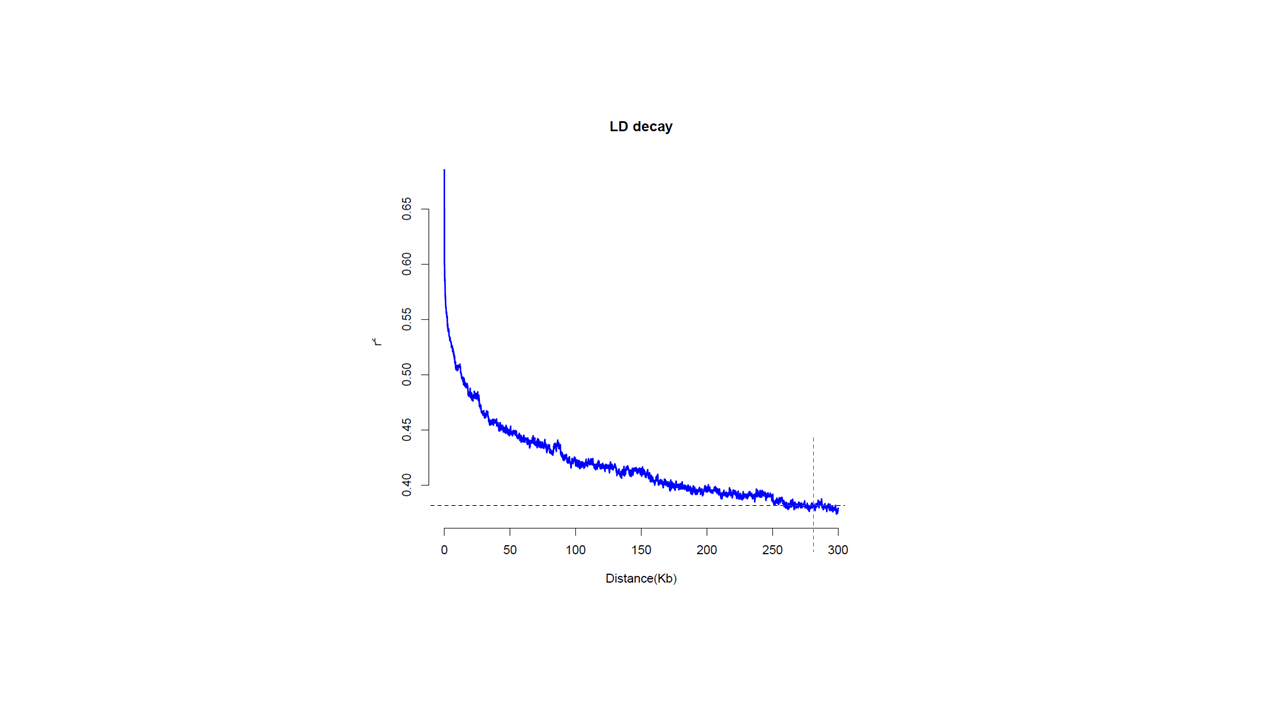
Fig S2. Population structure analysis and phenotype distribution in different groups. (A) Phylogenetic tree of 169 rice accessions based on genotype. First circle: phylogenetic tree analysis results; different clades are indicated by different colors; second circle: structural analysis results; green yellow: subgroup 1; dark olive green: subgroup 2; Indian Red: subgroup 3; dark red: subgroup 4; third circle: group information on the basis of structure and phylogenetic analysis; the triangle sign is indica. (B) Box plots of the percentages of *bakanae* resistance scores among the 169 accessions in the different groups. The different letters indicate significant differences according to one-way ANOVA followed by Tukey's test (P<0.05).

Fig S3 Linkage disequilibrium (LD)decay curve on chromosome 9.


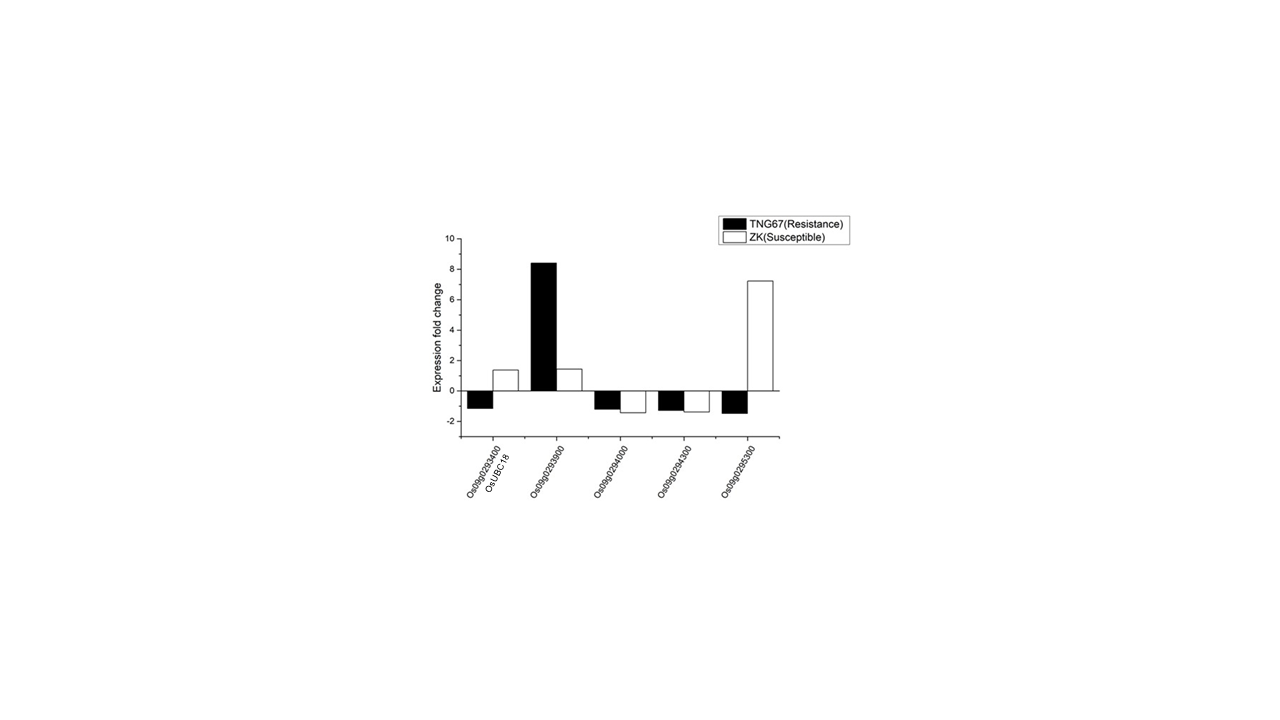


Fig S4. Expression analysis of candidate regions via public RNA-seq. data. TNG67 is a *bakanae*-resistant variety, and ZK is a susceptible variety.


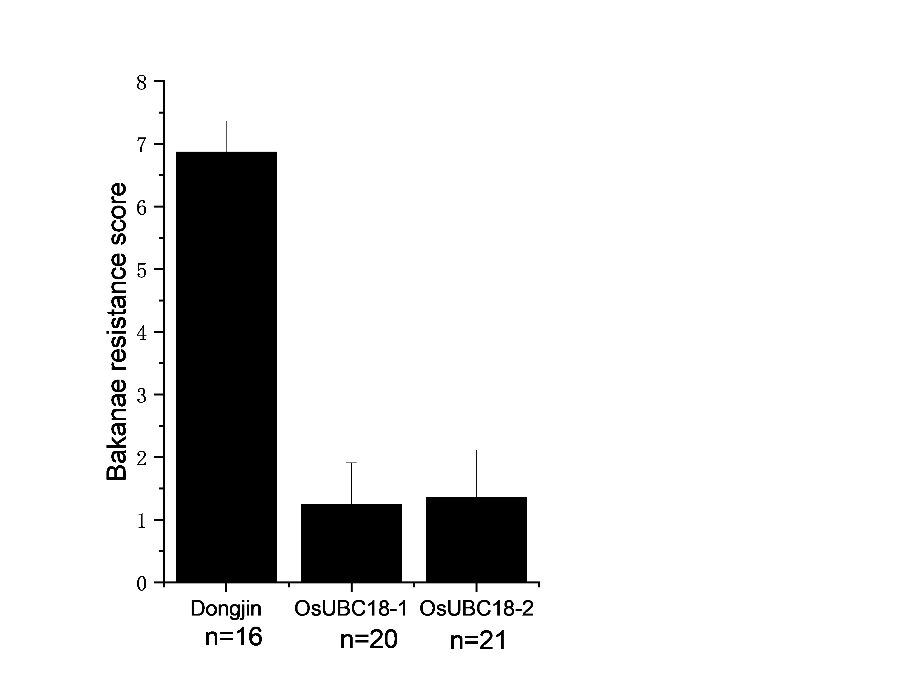


Fig S5 Bakanae resistance score of Dongjin and T-DNA mutant OsUBC18

Supplementary Table 1 Accessions information used in this study

| No. | ID | Accession Name | Subspecies |
| --- | --- | --- | --- |
| 1 | ja004 | Muyeopseoldo | Japonica |
| 2 | ja006 | Musaekjojeokjo | Japonica |
| 3 | ja010 | Chindadachigi | Japonica |
| 4 | ja013 | Yoo | Japonica |
| 5 | ja016 | Heuindadak | Japonica |
| 6 | ja019 | Maekdo | Japonica |
| 7 | ja020 | Dorae | Japonica |
| 8 | ja025 | Mido | Japonica |
| 9 | ja028 | Taegujo | Japonica |
| 10 | ja034 | Waejo | Japonica |
| 11 | ja035 | Sandudo | Japonica |
| 12 | ja036 | Noinjo | Japonica |
| 13 | ja038 | Baek Cheon | Japonica |
| 14 | ja039 | Geum Jeom Do | Japonica |
| 15 | ja045 | YEJO | Japonica |
| 16 | ja046 | Jangsamdo | Japonica |
| 17 | ja048 | Sandadagido | Japonica |
| 18 | ja049 | Damagung | Japonica |
| 19 | ja050 | Banchonjo | Japonica |
| 20 | ja055 | Dongobyeo | Japonica |
| 21 | ja058 | MIGWANG | Japonica |
| 22 | ja061 | Daegwando | Japonica |
| 23 | ja066 | Eunjo | Japonica |
| 24 | ja069 | Haerim | Japonica |
| 25 | ja071 | Chimabyeo | Japonica |
| 26 | ja077 | Gaori | Japonica |
| 27 | ja078 | Monajo | Japonica |
| 28 | ja085 | Neulbyeo | Japonica |
| 29 | ja086 | Gawichal | Japonica |
| 30 | ja087 | Sanduchalbyeo | Japonica |
| 31 | ja088 | NEULBYEO | Japonica |
| 32 | ja089 | Icheon7ilchal | Indica |
| 33 | ja090 | Bongok | Japonica |
| 34 | ja091 | Joseon | Japonica |
| 35 | ja098 | Nado | Japonica |
| 36 | ja099 | Jodo | Japonica |
| 37 | ja100 | Yukseongjaerae | Japonica |
| 38 | ja102 | HEUKPI | Japonica |
| 39 | ja103 | Heukpi | Japonica |
| 40 | ja104 | Heukmok | Japonica |
| 41 | ja105 | Sando | Japonica |
| 42 | ja106 | Sando | Japonica |
| 43 | ja107 | Hwaseongbatchal | Japonica |
| 44 | ja109 | Sandudo | Japonica |
| 45 | ja110 | Jwiipparibyeo | Japonica |
| 46 | ja111 | JAERAEYUKDO | Japonica |
| 47 | ja112 | Jeonggijosaeng | Japonica |
| 48 | ja113 | Jaeraejongdo | Japonica |
| 49 | ja114 | Nado | Japonica |
| 50 | ja116 | Yongmyeonheuk | Japonica |
| 51 | ja117 | Jeona | Japonica |
| 52 | ja118 | Gasanbyeo | Japonica |
| 53 | ja119 | Guando | Japonica |
| 54 | ja121 | Jeongjonghwa | Japonica |
| 55 | ja123 | SODUJO | Japonica |
| 56 | ja124 | Ojeonggeun | Japonica |
| 57 | ja125 | Dadajo | Japonica |
| 58 | ja126 | Oigukbyeo | Japonica |
| 59 | ja127 | Hongdo | Japonica |
| 60 | ja128 | Pyeongyang | Japonica |
| 61 | ja129 | Paldado | Japonica |
| 62 | ja131 | Sandudo | Japonica |
| 63 | ja132 | Chanseobyeo | Japonica |
| 64 | ja133 | Dadujo | Japonica |
| 65 | ja134 | Sinbaekseok | Japonica |
| 66 | ja136 | Dangdo | Japonica |
| 67 | ja138 | Orido | Japonica |
| 68 | ja139 | Pungujo | Japonica |
| 69 | ja141 | Obaekjo | Japonica |
| 70 | ja142 | Bujari | Japonica |
| 71 | ja143 | Noindo | Japonica |
| 72 | ja144 | Guido | Japonica |
| 73 | ja147 | NOINJO | Japonica |
| 74 | ja148 | Seogandodo | Japonica |
| 75 | ja154 | Joslbichal | Japonica |
| 76 | ja155 | Ddangbyeo | Japonica |
| 77 | ja156 | Daejichal | Japonica |
| 78 | ja158 | Obaekjo | Japonica |
| 79 | ja160 | Hongsado | Indica |
| 80 | ja162 | Aengmi | Indica |
| 81 | ja164 | Noindo | Japonica |
| 82 | ja165 | Jagwangdo(Awn present) | Japonica |
| 83 | ja166 | Guhwangdo | Japonica |
| 84 | ja167 | Hyoseongjaeraejong | Indica |
| 85 | ja169 | Chanseobyeo | Japonica |
| 86 | ja171 | Soemeoribyeo | Japonica |
| 87 | ja173 | Deokjeokjodo | Japonica |
| 88 | ja174 | Weonjabyeo | Indica |
| 89 | ja175 | Jangsamdo | Japonica |
| 90 | ja176 | Gangweonna | Japonica |
| 91 | ja177 | Gangweondo | Japonica |
| 92 | ja178 | Ginggalagsyale | Japonica |
| 93 | ja181 | Godudo | Japonica |
| 94 | ja182 | Joseondo | Japonica |
| 95 | ja188 | Dalgolmot | Japonica |
| 96 | ja191 | Sangdo | Japonica |
| 97 | ja193 | Daeguna | Japonica |
| 98 | ja194 | Daigolna | Japonica |
| 99 | ja197 | Inbujido | Japonica |
| 100 | ja200 | Chanarak | Japonica |
| 101 | ja207 | Mojo | Japonica |
| 102 | ja209 | Olbyeo | Japonica |
| 103 | ja210 | Daegudo | Japonica |
| 104 | ja212 | Agabyeo | Japonica |
| 105 | ja213 | Ssanmadeuragi | Japonica |
| 106 | ja217 | DUCHUNGJONG | Japonica |
| 107 | ja218 | Josaengjodo | Japonica |
| 108 | ja219 | BEOBPANHWA | Japonica |
| 109 | ja220 | Yonanco | Japonica |
| 110 | ja225 | Buldo | Japonica |
| 111 | ja226 | Cheonjeungdo | Japonica |
| 112 | ja227 | Daegoldo | Japonica |
| 113 | ja232 | Hwangdaiolbyeo | Japonica |
| 114 | ja233 | Cheonpungdo | Japonica |
| 115 | ja243 | Buljo | Japonica |
| 116 | ja246 | Jjoljangbyeo | Japonica |
| 117 | ja247 | Hansujindo | Japonica |
| 118 | ja248 | Pocheonryukdo | Japonica |
| 119 | ja253 | Annamjo | Japonica |
| 120 | ja255 | Hongdodo | Japonica |
| 121 | ja256 | Hongna | Japonica |
| 122 | ja258 | Jodo | Japonica |
| 123 | ja260 | Agukdo | Japonica |
| 124 | ja261 | Hangibuji | Japonica |
| 125 | ja264 | Hwangju | Japonica |
| 126 | ja265 | Batnarak | Japonica |
| 127 | ja267 | Hannaebyeo | Japonica |
| 128 | ja268 | PYEONGBUK 4 | Japonica |
| 129 | ja269 | Sando | Japonica |
| 130 | ja271 | Soenbenchigi | Japonica |
| 131 | ja272 | Boribyeo | Japonica |
| 132 | ja273 | Olbyeo | Japonica |
| 133 | ja274 | Hwangtojo | Japonica |
| 134 | ja281 | Gangreungdo 106 | Japonica |
| 135 | ja282 | CHIGYEONGDO | Japonica |
| 136 | ja284 | JODO | Japonica |
| 137 | ja292 | Geumdo | Japonica |
| 138 | ja293 | Doaji | Japonica |
| 139 | ja295 | Jinhwa | Japonica |
| 140 | ja298 | Dongsanjo | Japonica |
| 141 | ja299 | CHANARAK(B) | Japonica |
| 142 | ja301 | Weoljo | Japonica |
| 143 | ja302 | Jeokmosaek | Japonica |
| 144 | ja306 | Deokjeokjodo | Japonica |
| 145 | ja307 | Geum chang Do | Japonica |
| 146 | ja308 | Chimabyeo | Japonica |
| 147 | ja310 | Naengdo | Japonica |
| 148 | ja313 | Cheongsongjo | Japonica |
| 149 | ja315 | Ddangjo 131 | Japonica |
| 150 | ja316 | MAEKJO | Japonica |
| 151 | ja317 | Yeosubyeo | Japonica |
| 152 | ja318 | SULLSULLDO | Japonica |
| 153 | ja319 | Jandadagi | Japonica |
| 154 | ja320 | HONGDODO | Japonica |
| 155 | ja322 | Modo | Japonica |
| 156 | ja324 | Ninado | Japonica |
| 157 | ja331 | Dabaekjo | Japonica |
| 158 | ja334 | SUJUNGJO | Japonica |
| 159 | ja338 | Duchungjong | Japonica |
| 160 | ja356 | Gujungdo | Japonica |
| 161 | ja365 | Hongcheonchalbyeo | Japonica |
| 162 | ja367 | Nokdudo | Japonica |
| 163 | ja371 | Heukdo | Japonica |
| 164 | ja372 | Arongbyeo | Japonica |
| 165 | ja373 | Heukdaegu | Japonica |
| 166 | ja384 | Seondal | Japonica |
| 167 | ja387 | Sundal | Japonica |
| 168 | ja391 | Ssubyeo | Japonica |
| 169 | ja394 | Hwado | Japonica |

Supplementary Table 2 Mapping results of RNA-seq reads of Zerawchanica karatals (ZK) and Tainung 67 (TNG67) under dH2O-treated or F. fujikuroi-inoculated conditions

| Librarya | SRR ID | Total paired-end raw reads | Total paired-end clean reads | Total mapped reads (%)b |
| --- | --- | --- | --- | --- |
| ZK_Mock_1 | SRR11002540 | 2 × 27,382,764 | 2 × 25,433,590 | 23,978,788 (94.28%) |
| ZK_Mock_2 | SRR11002536 | 2 × 23,683,715 | 2 × 21,706,443 | 20,067,606 (92.45%) |
| TNG67_Mock_1 | SRR11002538 | 2 × 22,656,070 | 2 × 20,799,037 | 19,474,138 (93.63%) |
| TNG67_Mock_2 | SRR11002534 | 2 × 20,354,874 | 2 × 18,750,132 | 17,184,495 (91.65%) |
| ZK_Ff_1 | SRR11002539 | 2 × 22,132,341 | 2 × 20,340,352 | 18,322,589 (90.08%) |
| ZK_Ff_2 | SRR11002535 | 2 × 26,386,770 | 2 × 24,193,434 | 22,352,313 (92.39%) |
| TNG67_Ff_1 | SRR11002537 | 2 × 30,997,323 | 2 × 28,723,020 | 25,893,802 (90.15%) |
| TNG67_Ff_2 | SRR11002533 | 2 × 23,573,542 | 2 × 21,658,414 | 20,122,832 (92.91%) |

a ZK: Zerawchanica karatals; TNG67: Tainung 67; Mock: dH2O-treated; Ff: F. fujikuroi-inoculated; 1: pooled sample from independent trial 1; 2: pooled sample from independent trial 2

bThe percentages were calculated based on the total number of clean reads.

Supplementary Table 3 Primers used in this study

| Primer ID | Forward primer(5'-3') | Reverse primer(5'-3') | Annotation |
| --- | --- | --- | --- |
| 900 | ACAAGAAAGGGAGGGTGGTT | CCCCATCATATCCTTGACCA | Pimer for expression analysis of Os09g0290900 |
| 1500 | AAGGAACCCAGCAACAACTG | GGATCGTTCCACCTCCTACA | Pimer for expression analysis of Os09g0291500 |
| 1700 | CCTGTAGGAGGAGGGAGGAG | CCACTGCTTGAGATCCCAGT | Pimer for expression analysis of Os09g0291700 |
| 2101 | CAACCGAACAAGGCCTAAGA | TCGAGTGCACCATATTCAGC | Pimer for expression analysis of Os09g0292101 |
| 2400 | CCGCATAGAAGGGTTGTTGT | TTGTGCAGCCTCATCTTCAG | Pimer for expression analysis of Os09g0292400 |
| 2900 | GAGTGAAGCATGCAGACAGC | GAACAGCCTCTCGGACATCT | Pimer for expression analysis of Os09g0292900 |
| bk9-1 | AGCCCAGCATTGACCATATC | GTGGCCTCTGGCTCTTGTAG | Pimer for expression analysis of Os09g0293400(OsUBC18) |
| bk9-2 | AGGAGGACGATGAGGTTGTG | CTGTCGTCACTCGCGTTAAA | Pimer for expression analysis of Os09g0293900 |
| bk9-3 | CTCGACAGCCTTGCATGTTA | AAGCCAACAGCAGCAAGAAT | Pimer for expression analysis of Os09g0294000 |
| bk9-4 | CCCCACATGTCAGCTACTCC | GGCGACCTTGTTGTTCCTC | Pimer for expression analysis of Os09g0294300 |
| bk9-5 | GAGGATTTGGTCCCTTTGCT | TTCCCTCGGTACCATAGCTG | Pimer for expression analysis of Os09g0295300 |
| OsGID1 | CACGTCAAGGTTGTCCAATG | GGTTAGCGTTGAGGAAGTCG | Pimer for expression analysis of Os05g0407500 |
| OsXTH8 | GCAAGAAGGAGCACCAGTTC | ATGATGTTTTGGGGATTCCA | Pimer for expression analysis of Os08g0237000 |
| GA20OX2 | GTCGCCGACTACTTCTCCAG | AGCGACAGCTCCTTCATCTC | Pimer for expression analysis of Os01g0883800 |
| GA3ox1 | CACACGGACTCAGGCTTCTT | TGAGCACATGGAAGAGATCG | Pimer for expression analysis of Os05g0178100 |
| OsActin | CCTGGCAGTATGAAGGTAGTTG | GAAGCACTTCATGTGGACGAT | Internal control for expression analysis |
| bk9-1-T-DNA | CATTGAGGCCCTTGTTTAGG | TCTTCAGTAAAACGCCCACC | Pimer for positive verification of T-DNA mutants of OsUBC18 |
| TDNA-LB | CTAGAGTCGAGAATTCAGTACA |  | Pimer for positive verification of T-DNA mutants of OsUBC18 |

Table S4 QTLs identified by GLM, MLM, CMLM and FarmCPU models

| SNP | Chr | Pos | P.value | MAF | Effect | -log10p | Modle |
| --- | --- | --- | --- | --- | --- | --- | --- |
| S9_6944283 | 9 | 6944283 | 1.02E-08 | 0.147929 | 1.457598 | 7.992507 | FarmCPU |
| S6_29827809 | 6 | 29827809 | 6.09E-06 | 0.248521 | 1.025321 | 5.21507 | FarmCPU |
| S9_6944283 | 9 | 6944283 | 6.12E-06 | 0.147929 | 1.582168 | 5.213112 | CMLM |
| S9_6944283 | 9 | 6944283 | 9.07E-08 | 0.147929 | 1.69007 | 7.042299 | GLM |
| S9_6794608 | 9 | 6794608 | 1.22E-06 | 0.213018 | 1.642578 | 5.911968 | GLM |
| S9_6720080 | 9 | 6720080 | 6.10E-06 | 0.130178 | 1.510568 | 5.214605 | GLM |
| S9_6795259 | 9 | 6795259 | 7.98E-06 | 0.207101 | 1.462116 | 5.097777 | GLM |
| S9_6656685 | 9 | 6656685 | 1.35E-05 | 0.139053 | 1.391795 | 4.87033 | GLM |
| S9_6944283 | 9 | 6944283 | 6.12E-06 | 0.147929 | 1.582168 | 5.213112 | MLM |

Table S5 Candidate genes in qBK9 region 1

| Putative genes | Position start | Position end | stand | gene annotation |
| --- | --- | --- | --- | --- |
| Os09g0290600 | 6646921 | 6650835 | + | Conserved hypothetical protein |
| Os09g0290700 | 6651255 | 6651710 | - | Conserved hypothetical protein |
| Os09g0290900 | 6673037 | 6678975 | + | Similar to H1005F08.16 protein |
| Os09g0291500 | 6745873 | 6746376 | + | Conserved hypothetical protein |
| Os09g0291700 | 6756705 | 6757136 | + | Conserved hypothetical protein |
| Os09g0292101 | 6798832 | 6803053 | - | Conserved hypothetical protein |
| Os09g0292300 | 6803261 | 6806757 | + | Myb/SANT-like domain domain containing protein |
| Os09g0292350 | 6805465 | 6810554 | - | Hypothetical protein |
| Os09g0292400 | 6810220 | 6810609 | + | Conserved hypothetical protein |
| Os09g0292900 | 6873236 | 6874612 | + | OsFBX310 - F-box domain containing protein expressed |
| Os09g0293400 | 6947883 | 6950902 | + | Ubiquitin-conjugating enzyme |
| Os09g0293450 | 6949087 | 6950619 | - | Non-protein coding transcript |
| Os09g0293500 | 6954967 | 6959667 | - | serine 2Fthreonine-protein kinase BRI1-like 1 precursor putative expressed |
| Os09g0293601 | 6973353 | 6974004 | + | Conserved hypothetical protein |
| Os09g0293900 | 6990927 | 6994473 | + | FKBP-type peptidyl-prolyl cis-trans isomerase |
| Os09g0294000 | 6995055 | 7009477 | - | Homoserine dehydrogenase |
| Os09g0294300 | 7017626 | 7020961 | - | Ubiquitin-conjugating enzyme |
| Os09g0294550 | 7038132 | 7038397 | + | Conserved hypothetical protein |
| Os09g0294800 | 7045390 | 7046136 | + | Conserved hypothetical protein |
| Os09g0294901 | 7052921 | 7054384 | + | Conserved hypothetical protein |
| Os09g0295000 | 7077214 | 7078851 | - | No apical meristem (NAM) protein |
| Os09g0295200 | 7083652 | 7086647 | + | Conserved hypothetical protein |
| Os09g0295300 | 7087266 | 7087829 | - | expressed protein |
| Os09g0295850 | 7162835 | 7163860 | + | Conserved hypothetical protein |
| Os09g0296400 | 7166573 | 7171386 | + | Similar to predicted protein. |
| Os09g0296450 | 7166594 | 7170669 | - | Hypothetical protein |
| Os09g0296500 | 7172525 | 7173592 | + | Conserved hypothetical protein |
| Os09g0296700 | 7179985 | 7181868 | + | Glycosyl transferase, group 1 domain containing protein. |
| Os09g0296800 | 7185218 | 7188139 | + | Light-harvesting chlorophyll a/b-binding (LHC) protein |
| Os09g0296900 | 7189541 | 7196703 | + | WD40 repeat-like domain containing protein |
| Os09g0297000 | 7198635 | 7204743 | + | Ferrochelatase I, Oxyfluorfen herbicide resistance |
| Os09g0297100 | 7205157 | 7208171 | - | Similar to CROC-1-like protein |
| Os09g0297200 | 7218928 | 7220483 | - | Hypothetical protein |
| Os09g0297300 | 7218944 | 7220635 | + | Similar to sugar carrier protein C |
| Os09g0297400 | 7222188 | 7225657 | - | Phosphoenolpyruvate/phosphate translocator 1 |
| Os09g0297700 | 7229093 | 7229311 | + | Conserved hypothetical protein |
| Os09g0297800 | 7231651 | 7232571 | - | Similar to GPI-anchored protein |
| Os09g0297900 | 7233384 | 7234196 | - | Conserved hypothetical protein. |
